# Supplementary material
Source: PubMed Central journal article supplement (PMC3679355)

# Supplementary Figure 1

A

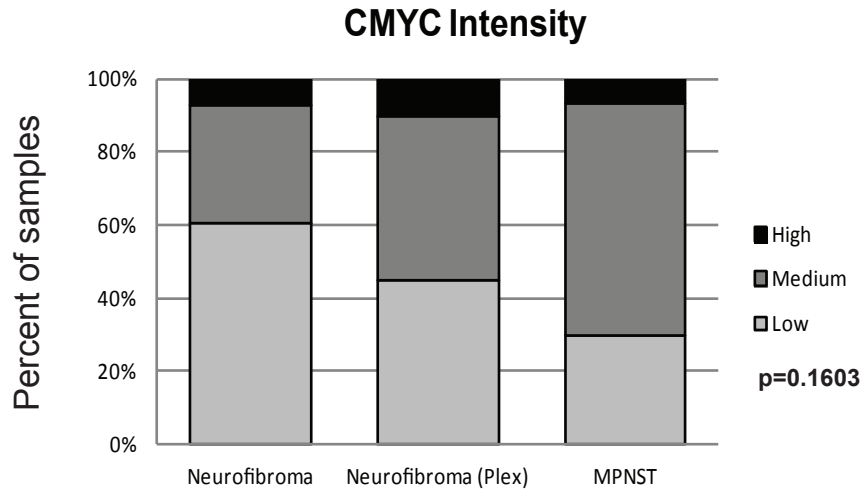

B CMYC Intensity

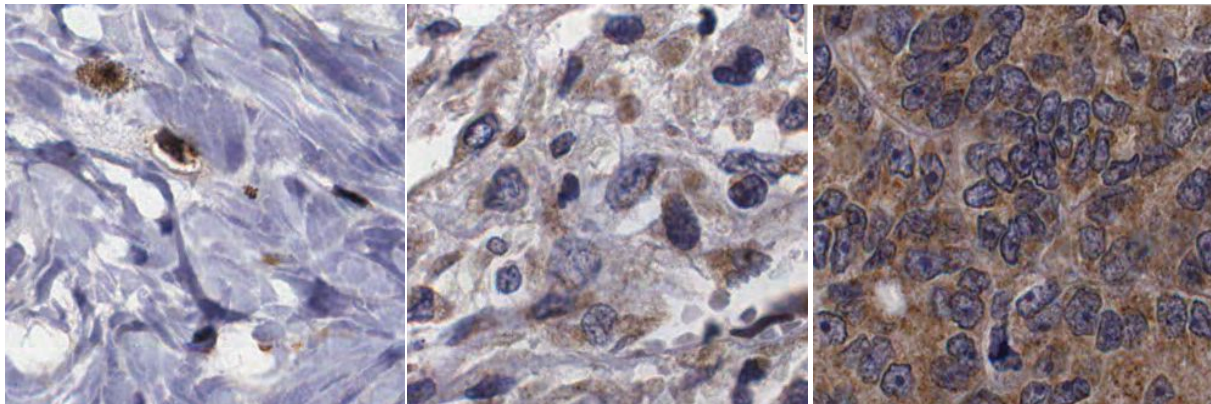

Low

Medium

High

Supplement: NIHMS461199-supplement-4.pdf [file NIHMS461199-supplement-4.pdf]
